# Supplementary material
Source: PubMed Central journal article supplement (PMC9240983)
Supplement: mmc1.pdf [file mmc1.pdf]

## **Assessing Health worker hesitancy in the initial deployment of the covid -19 vaccine as part of the pandemic response plan in Nigeria**

### **Questionnaire**

1. State
2. LGA
3. Ward
4. Name of Health Facility
5. Name of Health Worker(**optional**)
6. Age (**In years**)
7. Gender (**Male/Female**)
8. Cadre (**Nurse/Midwife/CHEW/Doctor/Lab scientist/Lab technologist/Pharmacist/Pharmacy technician/optometrist/environment health assistant**)
9. Type of HF HW works primarily (**Tertiary (Teaching hospital or specialist hospital, Secondary (General hospital;/District hospital, Primary (PHC Center, Community (Nursing home, Patent medical store, Health post)**)
10. Is the facility **Public or private**?
11. Have you previous tested positive to the Covid infection (**Yes/No**)?
12. Have you already received the covid vaccine (**Yes/No**)?
13. Are you aware of the type of covid vaccine you received?  
(**Pfizer/BioNTech/AstraZeneca/Johnson & Johnson/Moderna/Sputnik V/Sino pharm/Others**)
14. When did you receive the vaccine (Date)?
15. Will you offer this vaccine to your family or friends in subsequent phases of the vaccine deployment? (**Yes, No, Not sure**)
16. Are you willing to receive the vaccine still? (**Yes, No, Not sure**)
17. Why have you not received the vaccine yet (**Issues around safety/Not sure if the vaccine works/Worried about the effects on the vaccine on the genes/Already have had the infection so no need/Discouraged by family and friends, others (List other reasons)**)

18. Did you receive any information which influenced your decision to received or not to reason the vaccines? **(Yes or No)**
19. What negative information did you hear about the vaccine?
20. Did you cross check/validate if this negative information was factual? **(Yes or No)**
21. Where did you receive this information from (Source of information) which has influenced your decision not to receive the vaccine? **(TV, Radio, Social media, Health worker, Family and friends, Read from a scientific journal, Scientific websites, WHO or other health organizations, Religious or traditional leaders, others)**
22. Are you willing to accept the vaccine if your concerns are answered or additional information is shared with you? **(Yes, No, Maybe)**
